# Supplementary material for: Using lymph node swelling as a potential biomarker for successful vaccination
Source: PubMed Central journal article supplement (PMC5094952; doi:10.18632/oncotarget.9580), 2016-05-24
Supplement: oncotarget-07-35655-s001.pdf [file oncotarget-07-35655-s001.pdf]

# Using lymph node swelling as a potential biomarker for successful vaccination

## Supplementary Material

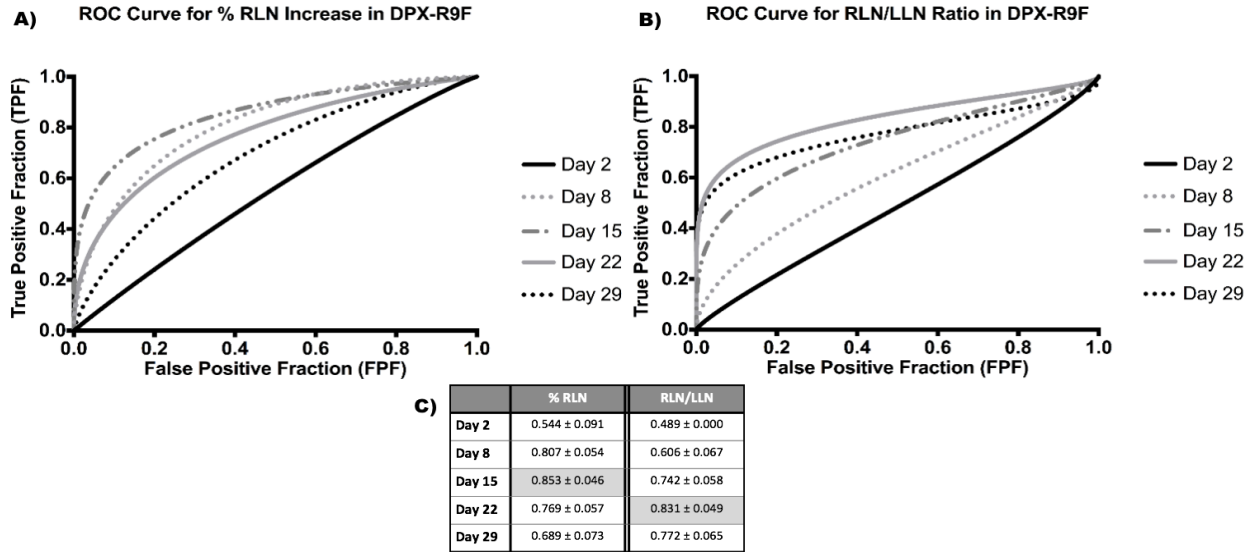

**Supplementary Figure 1** – ROC Curves for Biomarkers in DPX group. A) Fitted ROC curves for each time point for % RLN increase biomarker. B) Fitted ROC curves for each time point for RLN/LLN ratio biomarker. C) Area under the curve (AUC) values for each biomarker at each time point. Optimal values are highlighted.
